# Supplementary material for: Regulation of early growth response 2 expression by secreted frizzled related protein 1
Source: Springer Nature journal article supplement (doi:10.1186/s12885-017-3426-y), 2017-07-07
Supplement: MOESM3 [file 13288550]

**A**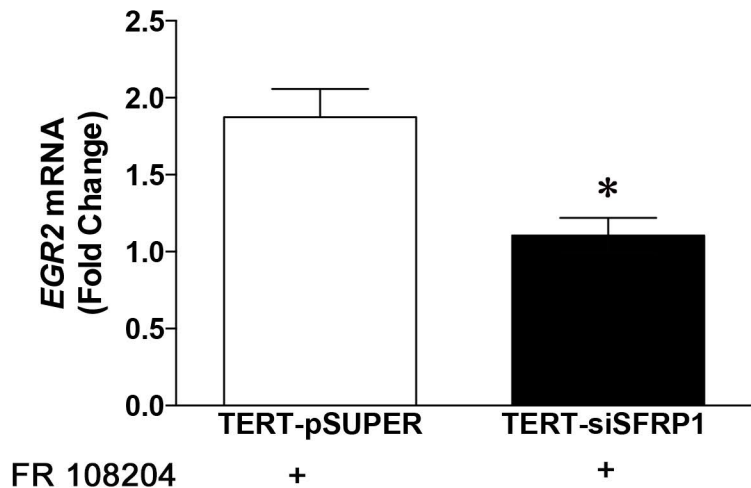**B**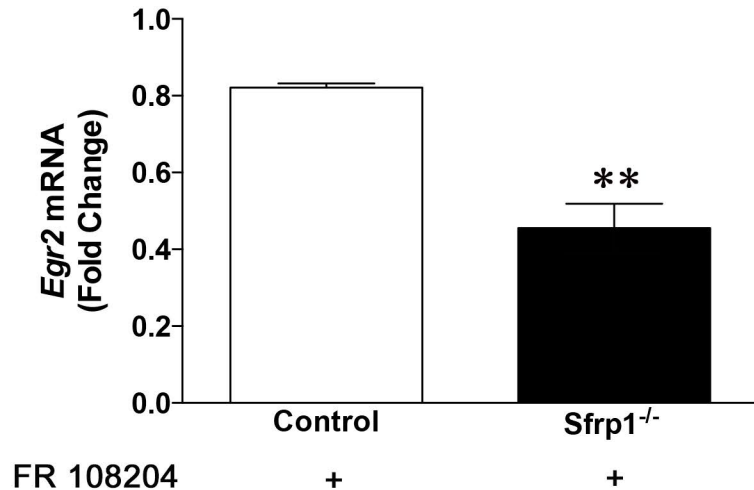**Supplemental Figure 3**
